# Supplementary material for: Midkine activation of CD8+ T cells establishes a neuron–immune–cancer axis responsible for low-grade glioma growth
Source: PubMed Central journal article supplement (PMC7195398; doi:10.1038/s41467-020-15770-3), 2020-05-01
Supplement: 41467_2020_15770_MOESM1_ESM.pdf [file 41467_2020_15770_MOESM1_ESM.pdf]

## **Supplementary Materials**

*Midkine activation of CD8<sup>+</sup> T cells establishes a neuron-immune-cancer axis responsible for low-grade glioma growth*

Guo X, Pan Y, Xiong M, Sanapala S, Anastasaki C, Cobb O, Dahiya S, Gutmann DH

**Address correspondence to:** David H. Gutmann, MD, PhD, Department of Neurology,  
Washington University, Box 8111, 660 S. Euclid Avenue, St. Louis, MO, USA 63110. 314-362-  
7379 (phone); [gutmannd@wustl.edu](mailto:gutmannd@wustl.edu) (email); ORCID #0000-0002-3127-5045

## **Supplementary Figures**

Supplementary Figure 1

Supplementary Figure 2

Supplementary Figure 3

Supplementary Figure 4

Supplementary Figure 5

Supplementary Figure 6

Supplementary Figure 7

Supplementary Figure 8

Supplementary Figure 9

## **Supplementary Tables**

Supplementary Table 1

Supplementary Table 2



## Supplementary Figures

### Supplementary Figure 1

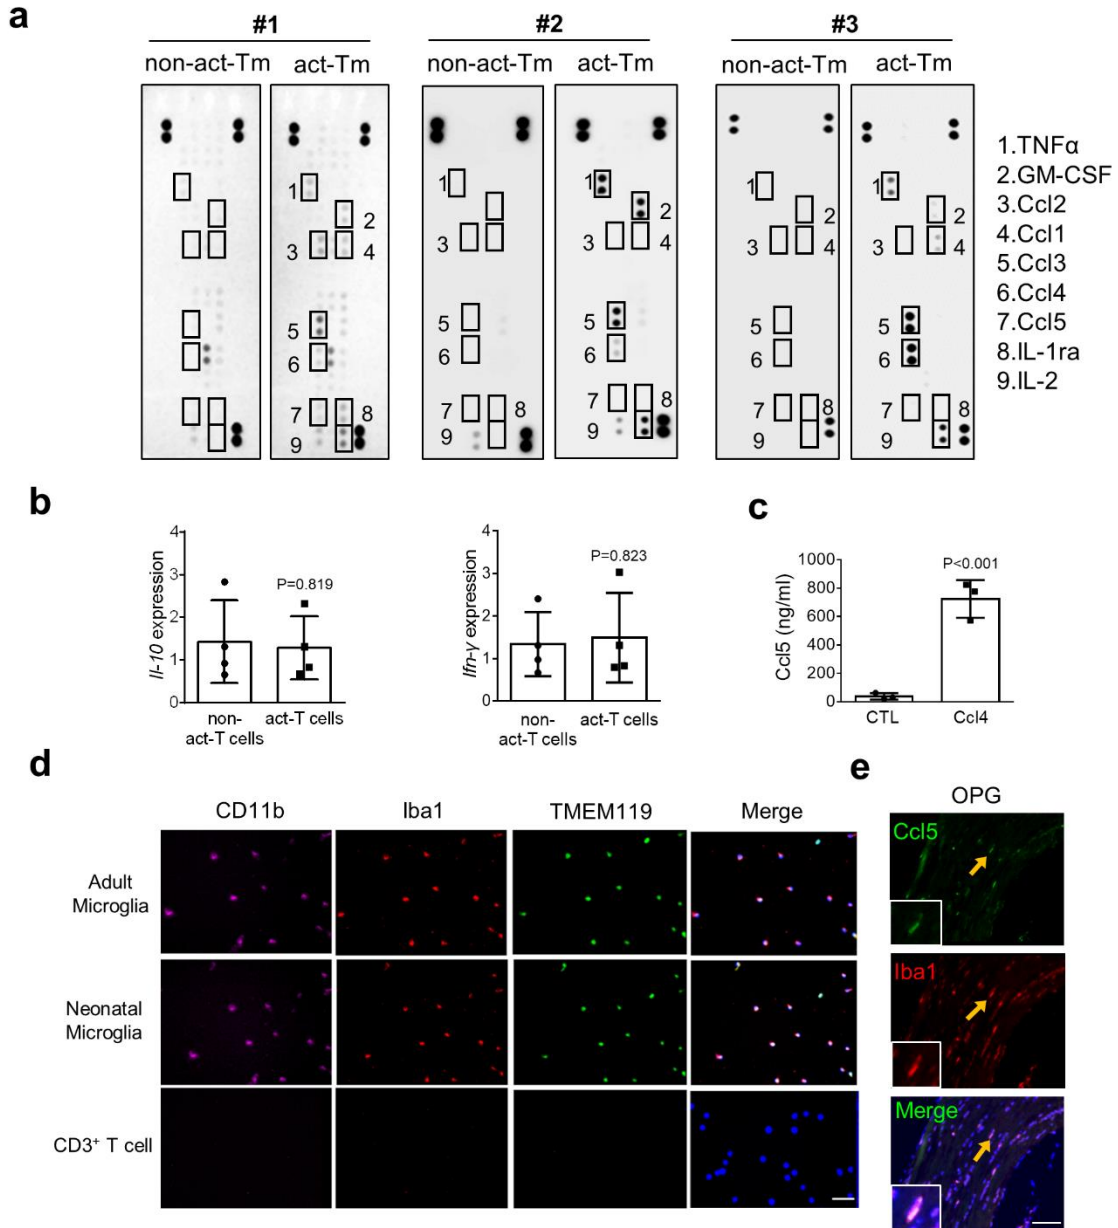

**Supplementary Figure 1. Neonatal microglia respond similarly as adult microglia to Ccl4.**

(a) WT splenic T cells were seeded at  $2.5 \times 10^6$  cells/ml in complete PRIM1640 medium, followed by two days CD3/CD28 stimulation (activated; act-Tm) or vehicle (PBS) treatment (non-

activated; non-act-Tm). CM was collected for chemokine array analysis using three independently treated sample sets. **(b)** Two cytokines (IL-10 and IFN- $\gamma$ ) whose CM expression was not different in the chemokine array between activated versus non-activated T cell CM exhibited no change at the RNA level using qRT-PCR. **(c)** WT neonatal microglia were stimulated with Ccl4 (6000 pg/ml) for 24 h at the concentrations detected in the activated T cell CM, and Ccl5 examined by ELISA. **(d)** The expression of CD11b, Iba1 and TMEM119 on adult microglia, neonatal microglia, and CD3<sup>+</sup> T cells (negative control) were examined by immunofluorescence. **(e)** Double-labeling immunofluorescence staining reveals Ccl5 staining in Iba1<sup>+</sup> cells. **(d-e)** Scale bars, 40  $\mu$ m. All data are presented as the mean  $\pm$  SEM. **(b, c)** Two-tailed Student's t-test. **(a)** n=3 independent biological samples were examined over 3 independent experiments. **(b)** The bar graphs represent means  $\pm$  SEM of **(b)** n=4 independent biological samples. **(c)** This representative experiment was conducted with n=3 independent biological samples and was replicated two additional times with similar results. **(d, e)** These are representative images of n=3 independent biological samples examined with similar results. Exact P values are indicated within each panel; N.S.; not significant. From left to right in each panel: **(b)** P=0.819, P=0.823; **(c)** P<0.001.

## Supplementary Figure 2

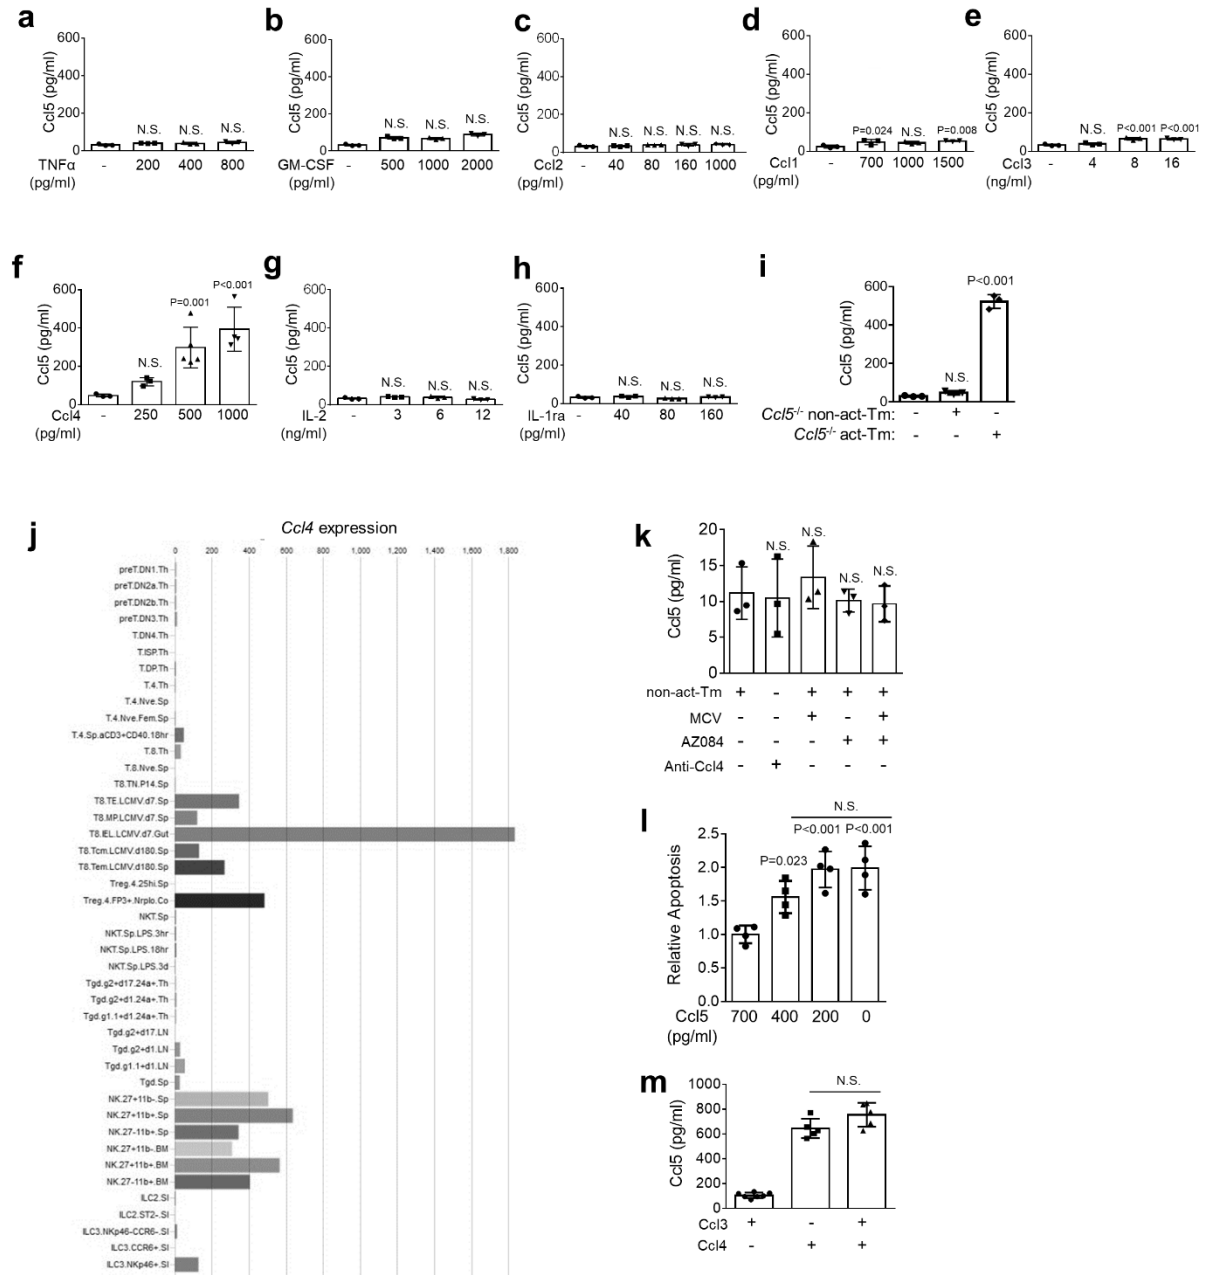

**Supplementary Figure 2. Ccl4 increases microglial Ccl5 production.** (a-h) The ability of the candidate cytokines detected in activated T cell CM to induce microglial Ccl5 release (ELISA) was measured over a concentration range. Ccl3 (8ng/ml and 16ng/ml) increased microglial Ccl5 production by 2-fold, whereas Ccl4 increased microglial Ccl5 production by 6.3 and 8.5-fold at

500pg/ml and 1ng/ml, respectively. **(i)** Activated *Ccl5*<sup>-/-</sup> T cell CM exhibited a similar potency as activated WT T cell CM in inducing microglia Ccl5 production. **(j)** *Ccl4* mRNA expression in different immune system cell types using the Immunological Genome Project on-line database ([www.immgen.org](http://www.immgen.org); supported by the National Cancer Institute)<sup>2</sup>. **(k)** Anti-Ccl4, MCV and AZ084 treatments did not change microglia Ccl5 production following exposure to non-activated T cell conditioned medium (non-act-Tm). **(l)** The effect of reducing Ccl5 on o-GSC apoptosis over a dose range was examined. **(m)** The combination of Ccl3 (8000 pg/ml) and Ccl4 (6000 pg/ml) did not exhibit further induction of microglial Ccl5 relative to Ccl4 (6000 pg/ml) alone. All data are presented as the mean  $\pm$  SEM. **(a-i, k-m)** One-way ANOVA with Bonferroni post-test correction. **(a-e)** Bar graphs represent the means  $\pm$ SEM of n=3 independent biological samples. **(f, g-i)** This representative experiment was conducted with **(f)** control and Ccl4 250 pg ml<sup>-1</sup> groups n=3, Ccl4 500 and 1000 pg ml<sup>-1</sup> groups n=4, **(g-i)** n=3, **(k-m)** n=4 independent biological samples and were replicated two additional times with similar results. Exact P values are indicated within each panel; N.S.; not significant. From left to right in each panel: **(a)** all N.S.; **(b)** all N.S.; **(c)** all N.S.; **(d)** P=0.024, N.S., P=0.008; **(e)** N.S., P<0.001, P<0.001; **(f)** N.S., P=0.001, P<0.001; **(g)** all N.S.; **(h)** all N.S.; **(i)** N.S., P<0.001; **(k)** all N.S.; **(l)** P=0.023, P<0.001, P<0.001, upper comparison, N.S.; **(m)** N.S.

### Supplementary Figure 3

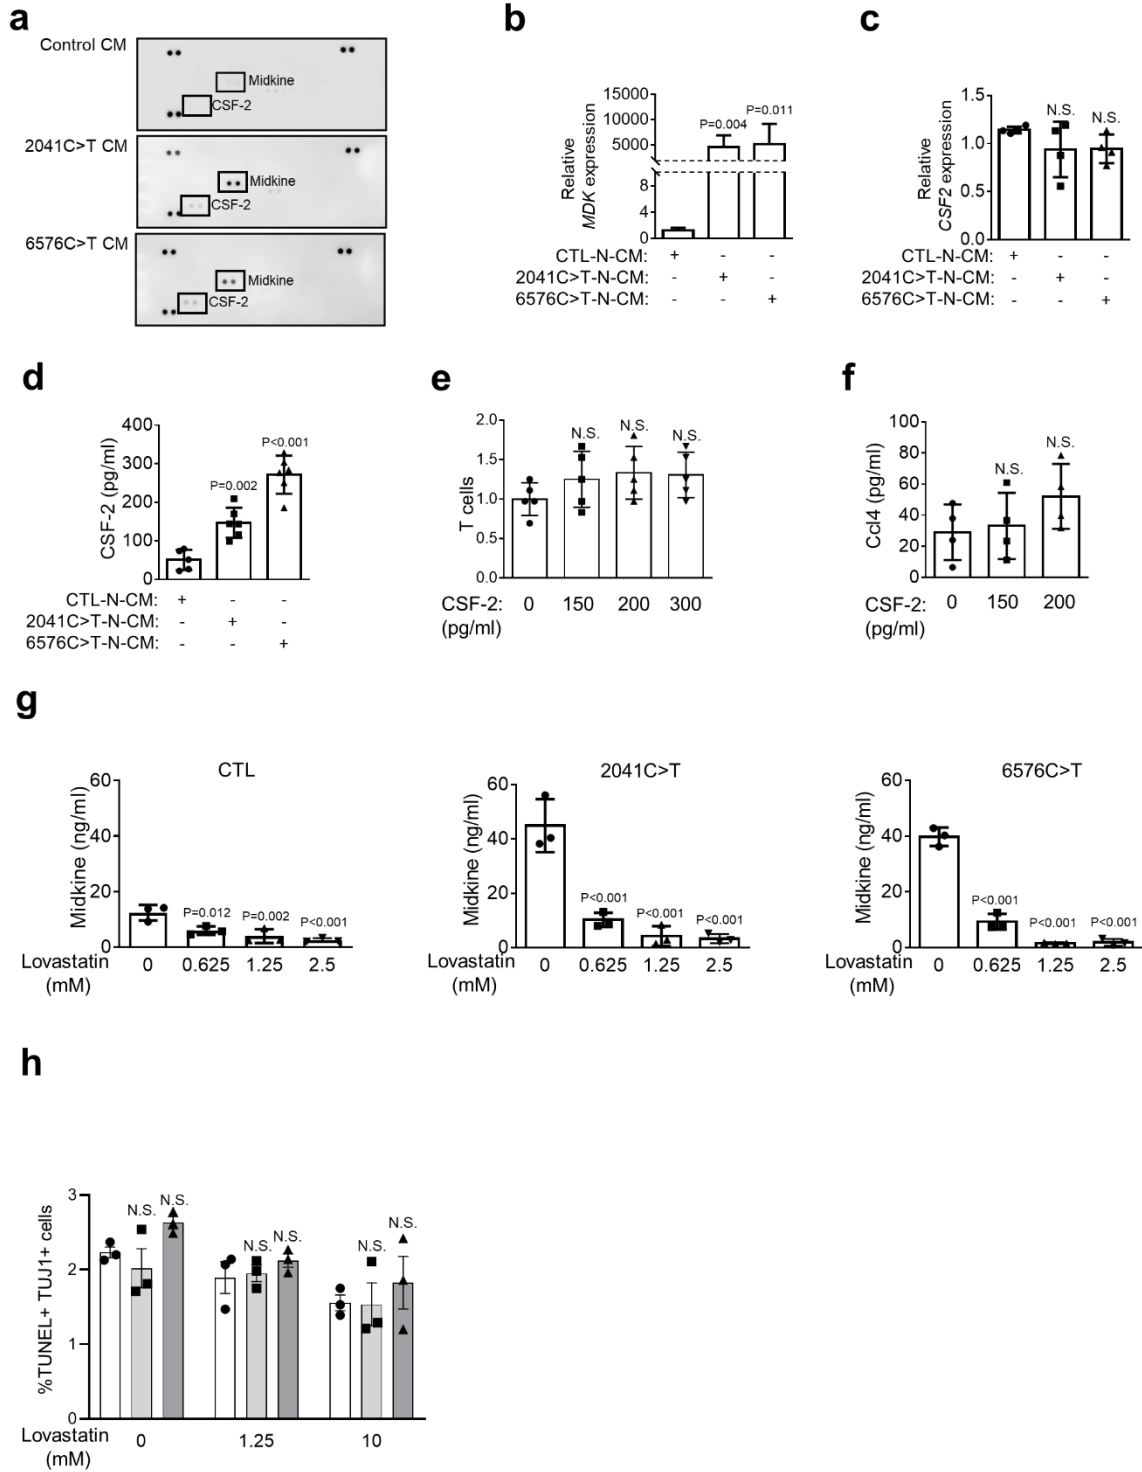

**Supplementary Figure 3. MDK expression is increased in *NF1*-mutant neuron conditioned medium.** (a) Human iPSC-induced neurons harboring homozygous *NF1* patient germline *NF1* gene mutations (c.2041C>T and c.6576C>T) released higher levels of midkine (MDK) and CSF-2 compared to WT iPSC-induced neurons. (b) Quantitative real-time RT-PCR reveals increased *MDK* gene expression in hiPSC-induced neurons harboring homozygous *NF1* patient germline *NF1* gene mutations (c.2041C>T and c.6576C>T). (c) *CSF2* RNA expression was not changed in c.2041C>T or c.6576C>T *NF1*-mutant, relative to control, hiPSC-derived neurons. (d) CSF-2 protein expression was increased in CM from c.2041C>T or c.6576C>T *NF1*-mutant, relative to control, hiPSC-derived neurons. (e) No change in T cell migration was observed in response to various CSF-2 concentrations. (f) No change in CD3<sup>+</sup> T cell Ccl4 expression was observed following CSF-2 exposure. (g) Control (CTL), c.2041C>T mutant and c.6576C>T mutant hiPSC-derived neurons were treated with lovastatin over a dose range (0.625 to 2.5 mM), and midkine release in the CM was measured. (h) Lovastatin did not affect *NF1*-het hiPSC-derived neuron apoptosis (% TUNEL<sup>+</sup> cells). White bars, control hiPSC-derived neurons; light grey bars, c.2041C>T hiPSC-derived neurons; dark grey bars, c.6576C>T mutant hiPSC-derived neurons. All data are presented as the mean  $\pm$  SEM. (b-h) One-way ANOVA with Bonferroni post-test correction. (b-c) Bar graphs represent the means  $\pm$ SEM of (b) n=5 or (c) n=4 independent biological samples. (d-g) These representative experiments were conducted with (d, e) n=5, (f) n=4, (g, h) n=3 independent biological samples and were replicated two additional times with similar results. Exact P values are indicated within each panel; N.S.; not significant. From left to right in each panel: (b) P=0.004, P=0.011; (c) both N.S.; (d) P=0.002, P<0.001; (e) all N.S.; (f) both N.S.; (g) left P=0.012, P=0.002, P<0.001; middle P<0.001, P<0.001, P<0.001; right P<0.001, P<0.001, P<0.001; (h) all N.S..



### Supplementary Figure 4

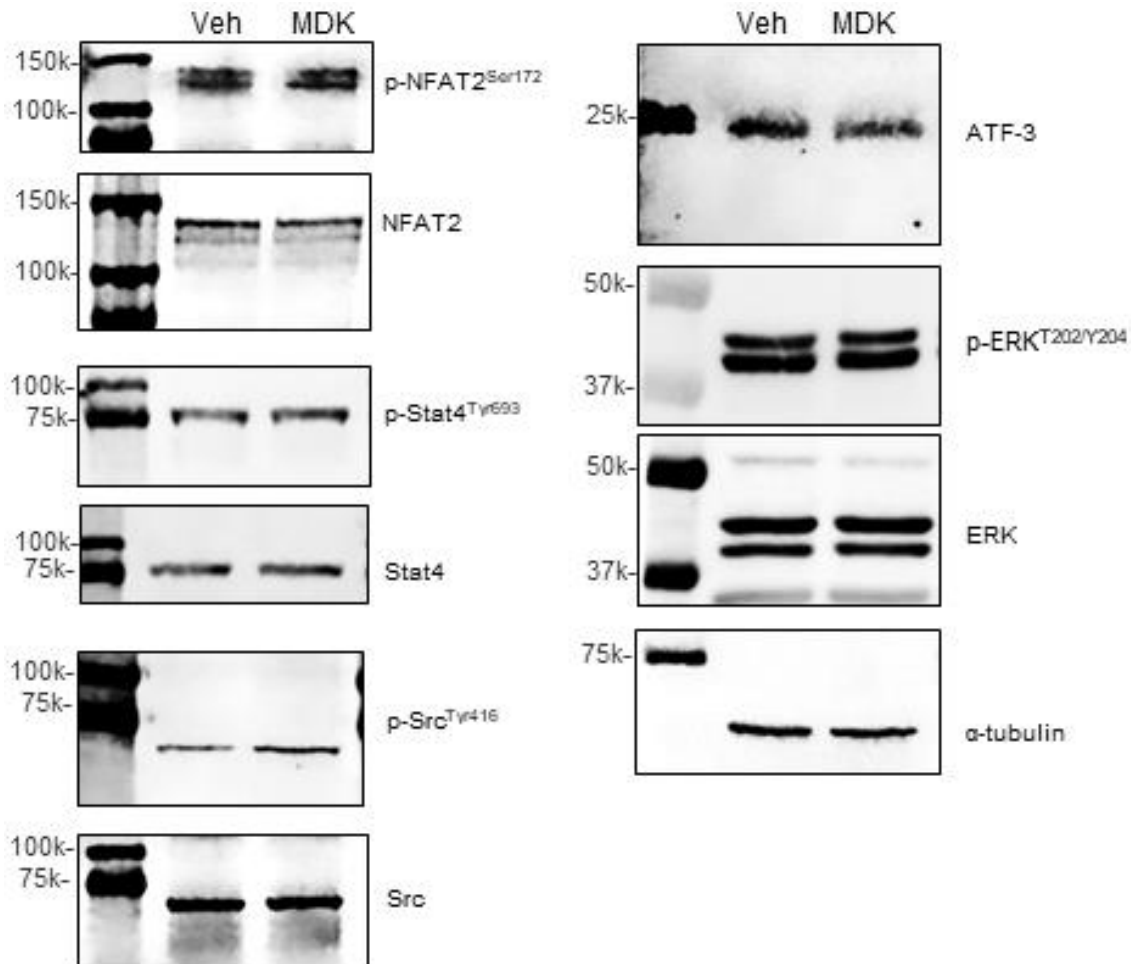

**Supplementary Figure 4. Immunoblotting of different proteins expression in T cells after midkine treatment.** No differences in NFAT2, Stat4, Src, ATF-3 and ERK activation were observed following midkine (50 ng/ml) treatment of T cells, as determined by immunoblotting with phospho-specific antibodies. n=3 independent biological samples were examined over 3 independent experiments with similar results. Molecular weight markers are denoted at the left side of each blot.

**Supplementary Figure 5**

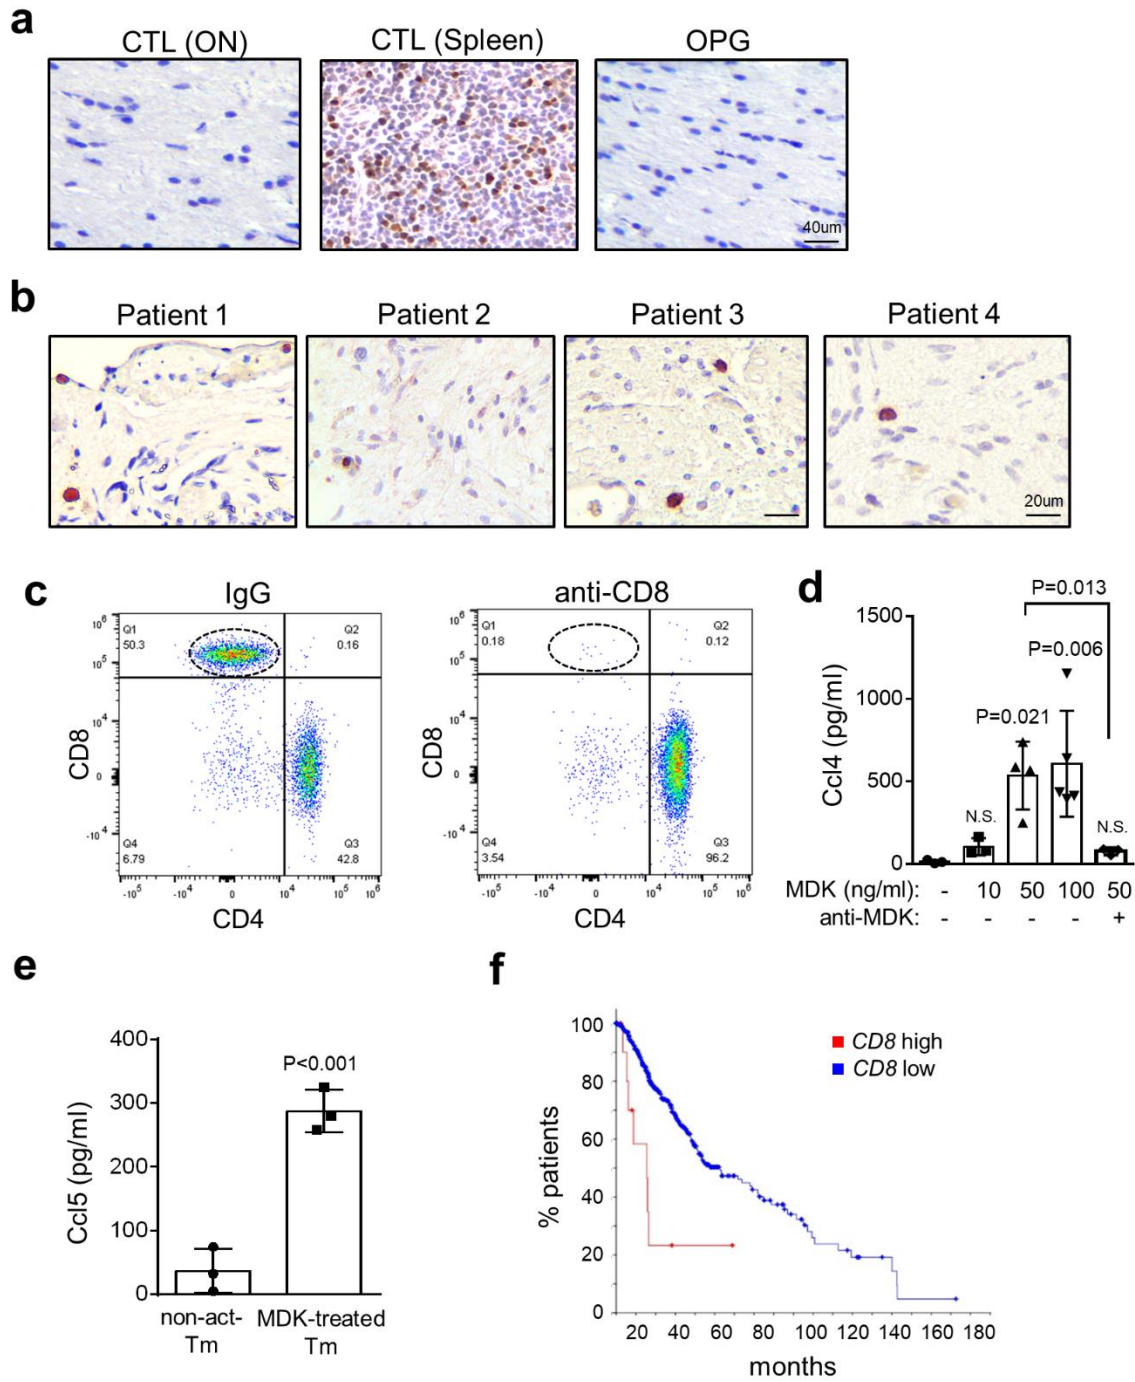

**Supplementary Figure 5. CD8<sup>+</sup> T cells mediate MDK/Ccl4-induced microglial Ccl5**

**production.** (a) No Foxp3<sup>+</sup> cells were detected in the optic nerves (ON) of control (CTL) or optic glioma (OPG)-bearing mice. WT mice spleen was used as a positive control for

immunohistochemistry. Scale bar, 40  $\mu\text{m}$ . **(b)**  $\text{CD8}^+$  T cells in PA specimens from NF1 patients (N=4 independent patient tumors). Scale bars, 20  $\mu\text{m}$ . **(c)**  $\text{CD8}^+$  T cells were depleted in splenocytes from anti-CD8 treated mice (0.18%), compared to IgG treated mice (50.3%), as measured by flow cytometry. **(d)** MDK (50 ng/ml or 100 ng/ml) stimulation for 48 h increased  $\text{CD8}^+$  T cell Ccl4 production. Anti-MDK antibodies reduced MDK-induced Ccl4 production by  $\text{CD8}^+$  T cells. **(e)** MDK-activated (50 ng/ml)  $\text{CD8}^+$  T cell CM (MDK-treated Tm) increased microglial Ccl5 production relative to non-activated  $\text{CD8}^+$  T cell CM (non-act-Tm). **(f)** Kaplan-Meier analysis reveals reduced disease/progression-free survival time in patients with low-grade gliomas harboring high *CD8* expression ( $P=3.678e-4$ ). Data were obtained from the MSKCC computational biology cancer genomics portal (<http://www.cbioportal.org>), which contains annotated TCGA data (Brain Lower Grade Glioma (TCGA, Provisional; mRNA expression Z score=2,  $P<0.001$ )). **(d, e)** Bar graphs represent the means  $\pm$  SEM of **(d)**  $n=4$  and **(e)**  $n=3$  independent biological samples. One-way ANOVA with Bonferroni post-test correction. Exact P values are indicated within each panel; N.S.; not significant. From left to right in each panel: **(d)** N.S.,  $P=0.021$ ,  $P=0.006$ , N.S.; upper comparison,  $P=0.013$ ; **(e)**  $P<0.001$ .

## Supplementary Figure 6

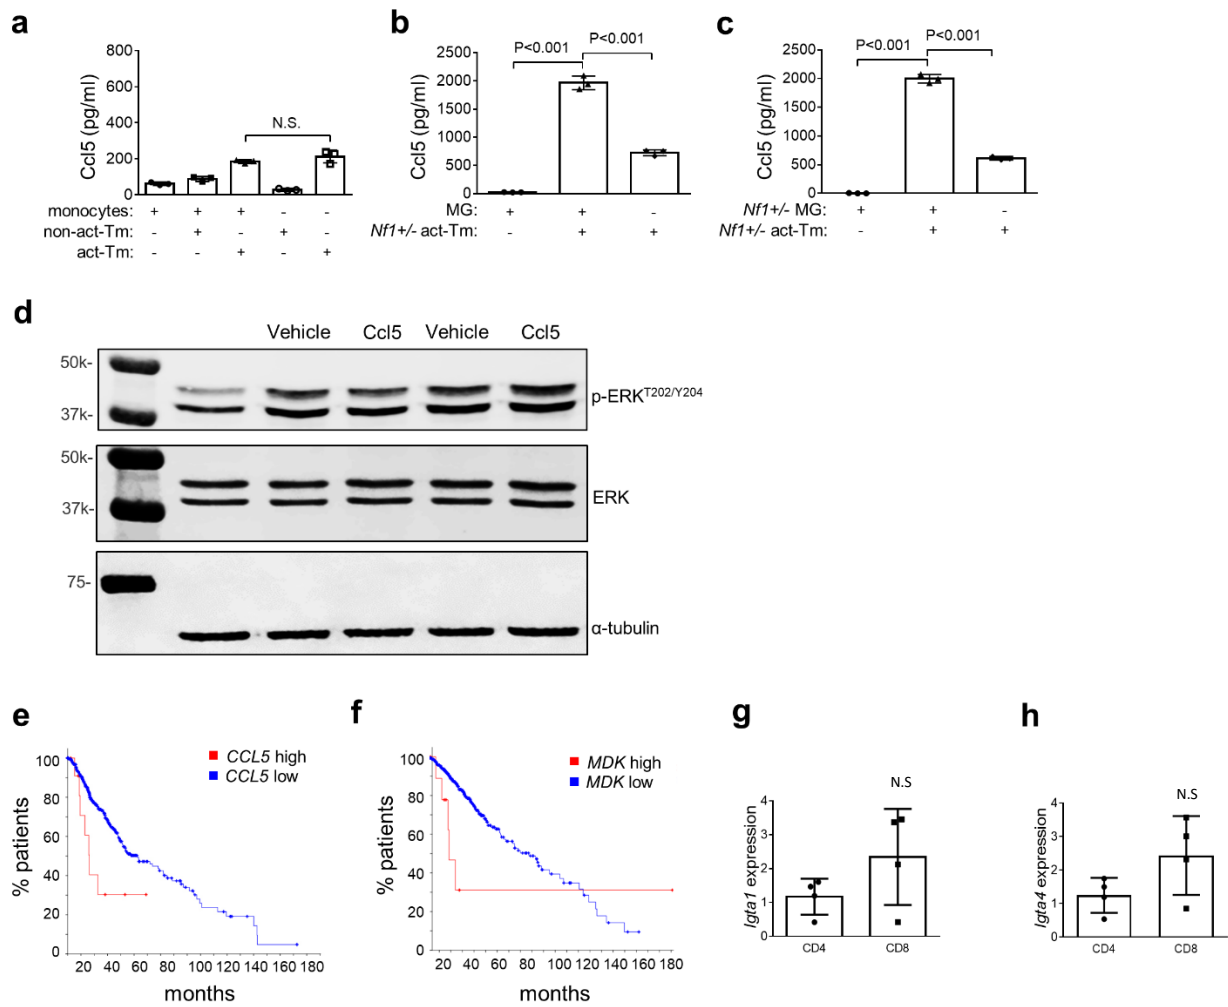

### Supplementary Figure 6. CCL5 is a critical regulator of low-grade glioma growth. (a)

Activated T cell CM (act-Tm) did not induce WT peripheral splenic monocytes (macrophages) to produce Ccl5. Naïve T cell CM (non-act-Tm) was included as a control. Activated *Nf1*<sup>+/-</sup> T cell CM treatment increases (b) WT and (c) *Nf1*<sup>+/-</sup> microglial (MG) Ccl5 production, similar to that observed following exposure to activated WT T cell CM. (d) Ccl5 stimulation did not increase ERK activation (p-ERK<sup>Thr202/Tyr204</sup>) in o-GSCs by immunoblotting. Total ERK and  $\alpha$ -tubulin served as internal protein loading controls. (e) Kaplan-Meier analysis demonstrates shorter

disease/progression-free survival time in patients with low-grade gliomas harboring high *CCL5* expression (P=0.0154). Data were obtained from the MSKCC computational biology cancer genomics portal (<http://www.cbioportal.org>), which contains annotated TCGA data (Brain Lower Grade Glioma [TCGA Provisional], mRNA expression Z score=2, P<0.001). **(f)** Kaplan-Meier analysis of low-grade glioma patients harboring high and low *MDK* expression (P= 0.181). Data was obtained from the MSKCC computational biology cancer genomics portal (<http://www.cbioportal.org>), which contains annotated TCGA data (Brain Lower Grade Glioma (TCGA, Firehose Legacy), mRNA expression Z score=2. **(g-h)** RT-qPCR of *Igta1* and *Igta4* in CD4<sup>+</sup> and CD8<sup>+</sup> T cells. All data are presented as the mean  $\pm$  SEM. **(a-c)** One-way ANOVA with Bonferroni post-test correction, **(g, h)** Two-tailed Student's t-test. **(a-c)** These representative experiments were conducted with n=3 independent biological samples and were replicated two additional times with similar results. **(g, h)** Bar graphs represent means  $\pm$  SEM of n=4 independent biological samples. Exact P values are indicated within each panel; N.S.; not significant. From left to right in each panel: **(a)** N.S., **(b)** P<0.001, P<0.001; **(c)** P<0.001, P<0.001; **(g)** N.S.; **(h)** N.S. **(d)** These are representative images of n=3 independent biological samples examined over three independent experiments with similar results. Molecular weight markers are denoted at the left side of each blot.

## Supplementary Figure 7

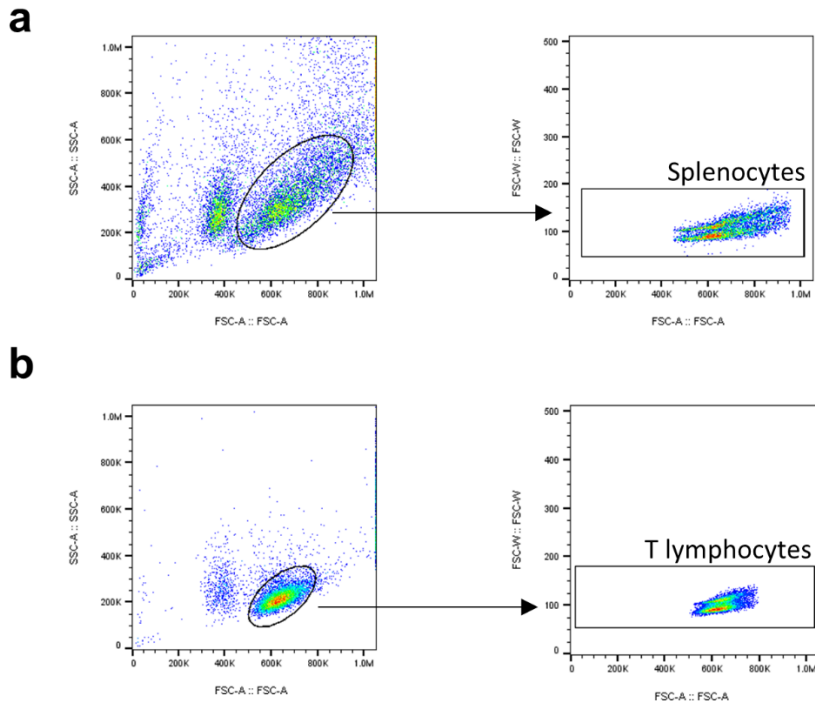

**Supplementary Figure 7. Gating strategies used for cell sorting. (a)** Gating strategy to sort splenocytes in **Fig. 4a**. **(b)** Gating strategy to sort T lymphocytes in **Supplementary Figure 5c** (T cells were pre-sorted from splenocytes using pan-T-cell isolation kit as described in “Methods” before the FACS analysis).

## Supplementary Figure 8

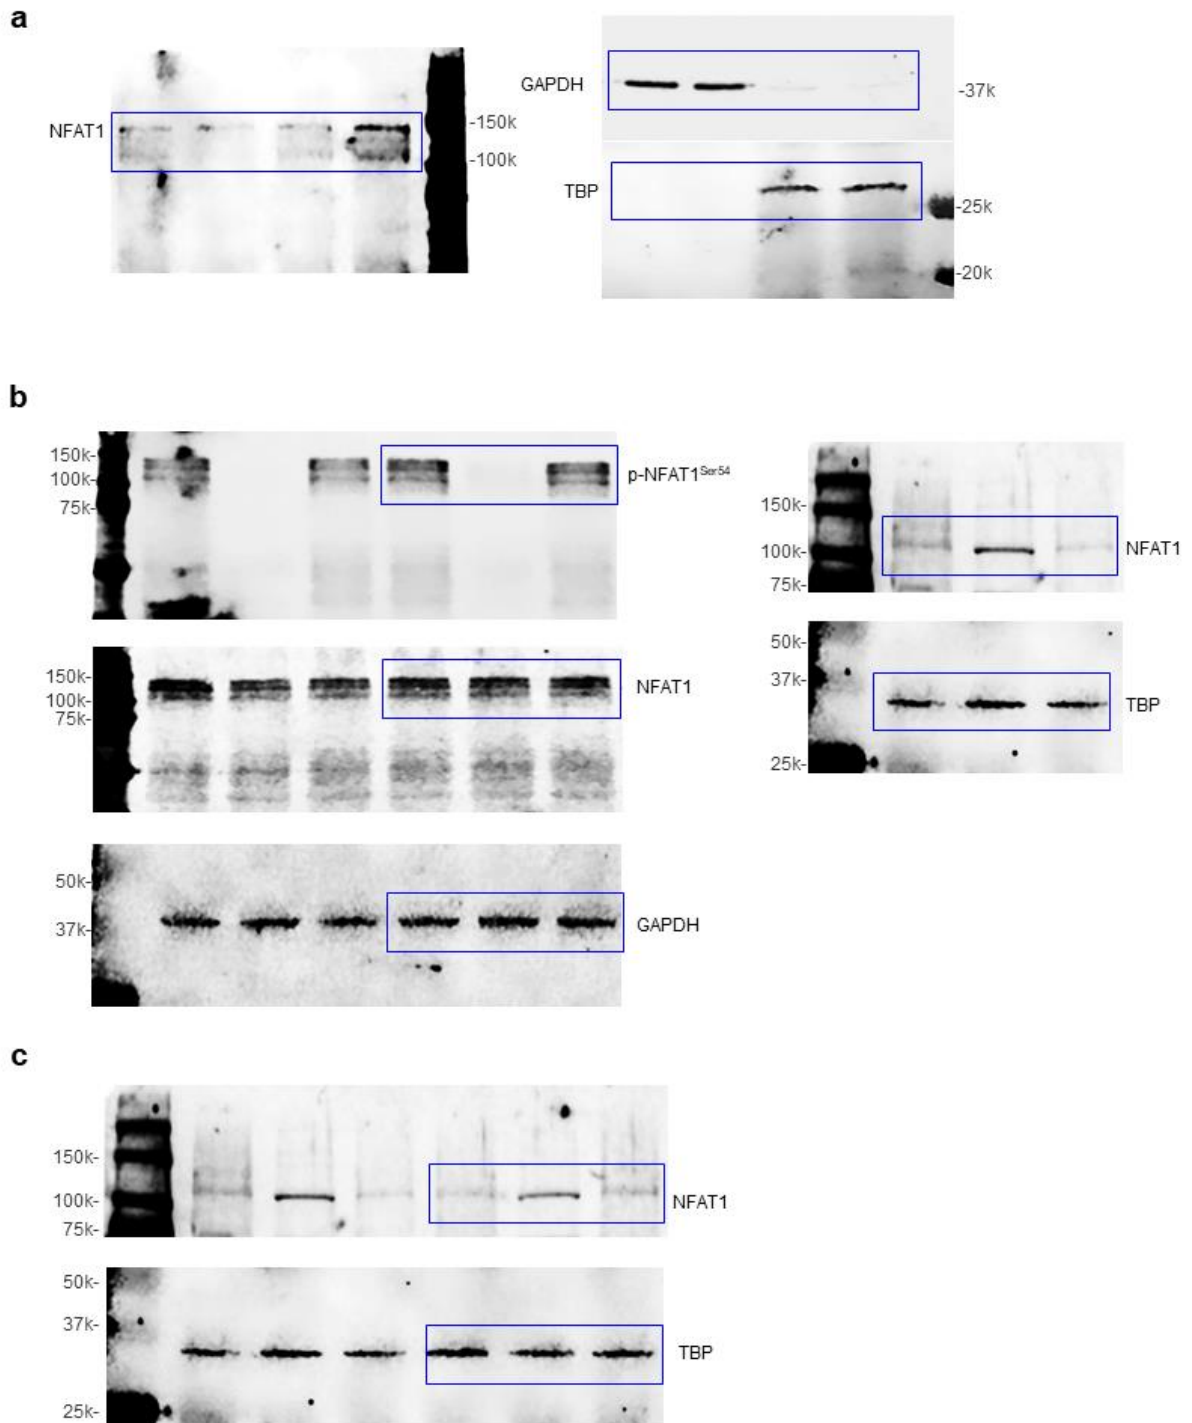

**Supplementary Figure 8. Original western blots for Figure 3.** Original uncropped immunoblots referring to Figures 3d (a), 3e (b) and 3f (c).

## Supplementary Figure 9

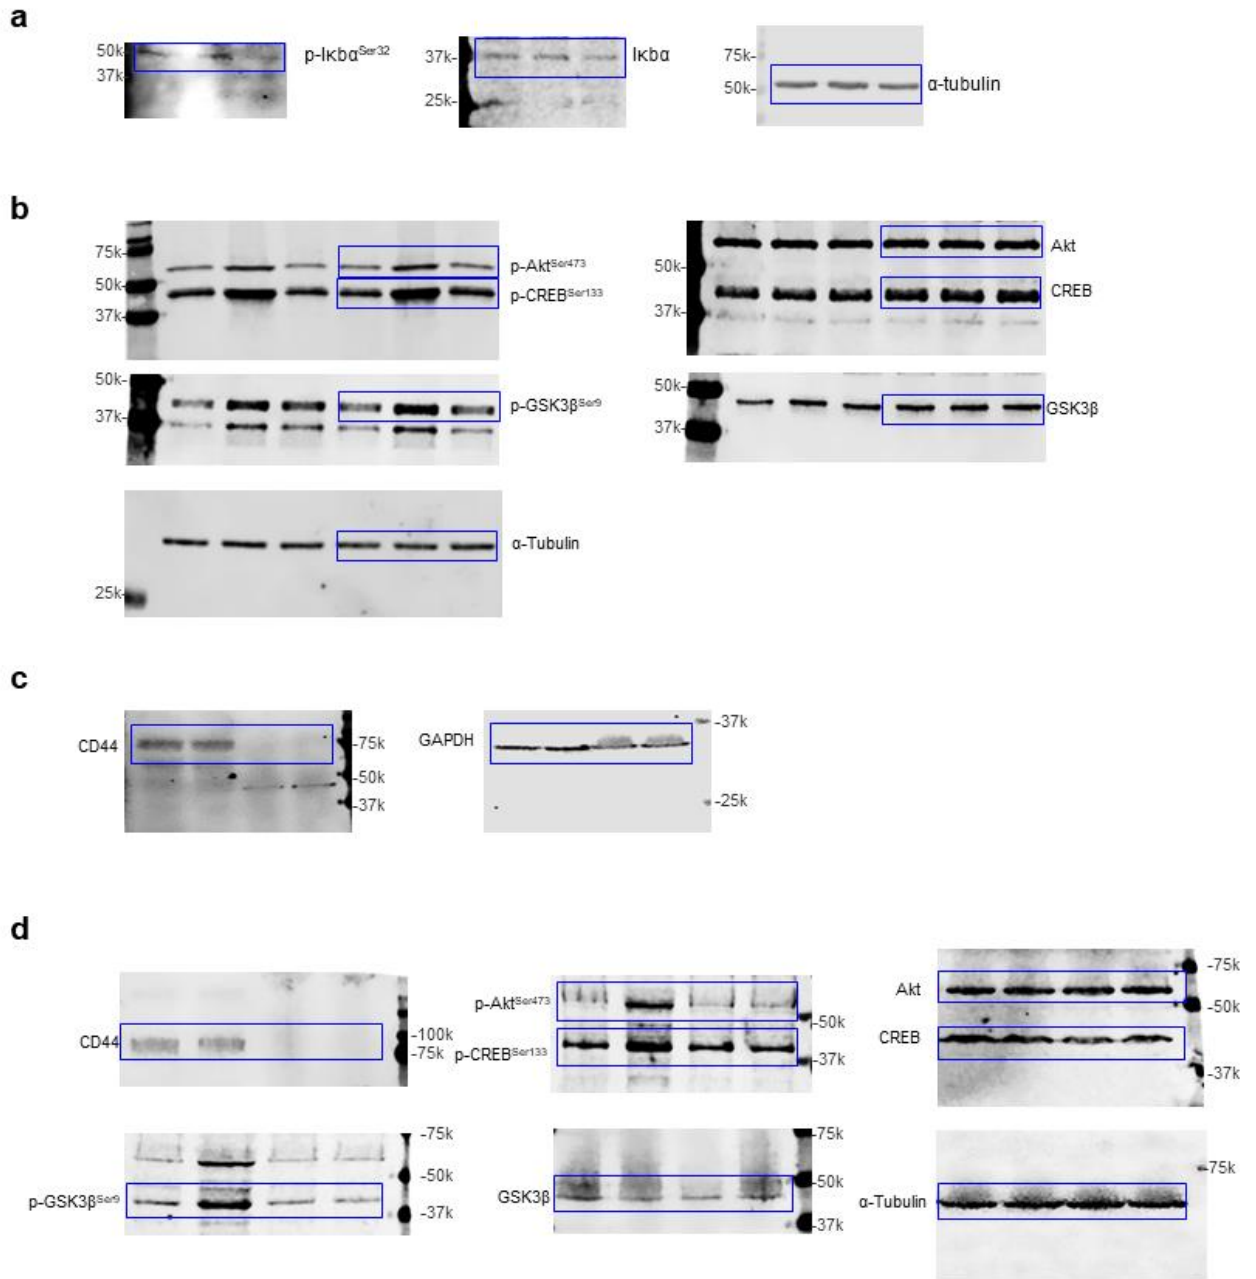

**Supplementary Figure 9. Original western blots for Figure 7.** Original uncropped immunoblots referring to **Figures 7a (a)**, **7e (b)** and **7h (c)** and **7j (d)**.



**Supplementary Table 1. Antibodies used.**

| Antibody                           | Host   | Source                | Lot/Clone   | Dilution   |
|------------------------------------|--------|-----------------------|-------------|------------|
| Akt (WB)                           | rabbit | Cell Signaling, 9272  | 28          | 1:1000     |
| anti-goat Alexa 488 (IF)           | donkey | Thermo, A-11055       | 2051233     | 1:200      |
| ATF-3 (WB)                         | rabbit | Cell Signaling, 3393  | 1           | 1:1000     |
| Biotinylated anti-mouse IgG (IHC)  | goat   | Vector, BA-9200       | ZE1207      | 1:200      |
| Biotinylated anti-rabbit IgG (IHC) | goat   | Vector, BA-1000       | ZF0809      | 1:200      |
| Biotinylated anti-rat IgG (IHC)    | goat   | Vector, BA-4000       | ZB1216      | 1:200      |
| Ccl5 (IF, IHC)                     | rabbit | Abcam, ab9679         | GR5419-73   | 2 µg/ml    |
| Ccl4 (IHC)                         | rabbit | AVIVA Sys., OAAB00178 | SA101014    | 1:50       |
| CD3 (IHC/IF, mouse)                | rat    | Abcam, 11089          | GR3210117-1 | 1:50       |
| CD3-PB (FACS)                      | rat    | BioLegend, 100213     | B189839     | 1.25 µg/ml |
| CD4 (IF)                           | rabbit | Abcam, 133616         | GR3240246-1 | 1:100      |
| CD4-PerCP (FACS)                   | rat    | BioLegend, 100431     | GR3240246-1 | 1.25 µg/ml |
| CD8a (IF)                          | rat    | Abcam, 22378          | GR3237266-1 | 1:100      |
| CD8a (IHC)                         | rabbit | Cell Signaling, 98941 | 8           | 1:600      |
| CD8a-APC/Cy7 (FACS)                | rat    | BioLegend, 100713     | ZB13216     | 2.5 µg/ml  |
| CD11b (IF)                         | rat    | Abcam, 8878           | GR3306578-1 | 2 µg/ml    |
| CD44 (WB)                          | rabbit | Abcam, 157107         | GR3210501-1 | 1:2000     |
| CREB (WB)                          | rabbit | Cell Signaling, 9197  | 16          | 1:1000     |
| Erk1/2 (WB)                        | rabbit | Cell Signaling, 9102  | 27          | 1:1000     |
| Foxp3 (IHC)                        | mouse  | Santa Cruz sc-53876   | A2918       | 1:1000     |
| GAPDH (WB)                         | mouse  | Abcam, 8245           | GR3395417-1 | 1:1000     |
| Gsk-3β (WB)                        | rabbit | Cell Signaling, 12456 | 8           | 1:1000     |
| Iba1 (IHC, IF)                     | goat   | Abcam, 5076           | GR3295070-1 | 2 µg/ml    |

|                                        |        |                       |             |              |
|----------------------------------------|--------|-----------------------|-------------|--------------|
| Iba1 (IF)                              | rabbit | Wako, 019-19741       | CAM6570     | 1:1000       |
| Ki67 (IHC)                             | mouse  | BD Pharmingen, 550609 | 8239549     | 1:500        |
| Midkine (IHC)                          | rabbit | Abcam, 170820         | GR169231-16 | 1:50         |
| NFAT1 (WB)                             | rabbit | Cell Signaling, 5558  | 4           | 1:500        |
| NFAT2 (WB)                             | rabbit | Cell Signaling, 8023  | 6           | 1:1000       |
| Phospho-CREB (Ser133) (WB)             | rabbit | Cell Signaling, 9199  | 14          | 1:1000       |
| Phospho-CREB (Ser133) (IHC)            | rabbit | Abcam, 32096          | GR3231215-4 | 1:200        |
| Phospho-Erk1(Thr204)/Erk2(Tyr187) (WB) | rabbit | Cell Signaling, 5726  | 1           | 1:1000       |
| Phospho-Gsk-3 $\beta$ (Ser9) (WB)      | rabbit | Cell Signaling, 5558  | 9           | 1:1000       |
| Phospho-Akt (Ser473) (WB)              | rabbit | Cell Signaling, 4060  | 27          | 1:1000       |
| Phospho-Akt (Ser473) (IHC)             | rabbit | Abcam, 81283          | GR3241584-5 | 1:100        |
| Phospho-NFAT1 (Ser54) (WB)             | rabbit | Invitrogen, 44-99G    | 2020147     | 1:300        |
| Phospho-NFAT2 (Ser172) (WB)            | mouse  | Novus, 679340         | MAP540-SP   | 1:500        |
| Phospho-Src (Tyr416) (WB)              | rabbit | Cell Signaling, 6943  | 4           | 1:1000       |
| Phospho-Stat4 (Tyr693) (WB)            | rabbit | Abcam, 28815          | 28815       | 1:500        |
| Src (WB)                               | rabbit | Cell Signaling, 2109  | 7           | 1:1000       |
| Stat4 (WB)                             | rabbit | Cell Signaling, 2653  | 3           | 1:1000       |
| TBP (WB)                               | mouse  | Abcam, 818            | GR3261953   | 1:500        |
| TMEM119 (IF)                           | rabbit | Abcam, 209064         | UJ2867641   | 1 $\mu$ g/ml |
| $\alpha$ -tubulin (WB)                 | mouse  | Cell Signaling, 3873S | 15          | 1:10,000     |

WB, Western blot; IHC, immunohistochemistry; IF, immunofluorescence; HRP, horseradish peroxidase

**Supplementary Table 2. qRT-PCR primers used.**

| <b>Gene</b>           | <b>Forward primer sequence</b> | <b>Reverse primer sequence</b> |
|-----------------------|--------------------------------|--------------------------------|
| <i>Alk</i> (mouse)    | CATTGATCCTCTCCGTCGTG           | CAGTTCCATCTGCATAGCCT           |
| <i>ACTB</i> (human)   | TGAAGTGTGACGTGGACATC           | GGAGGAGCAATGATCTTGAT           |
| <i>Ccl4</i> (mouse)   | CCACTTCCTGCTGTTTCTCTTA         | CTGTCTGCCTCTTTTGGTCAG          |
| <i>Ccl5</i> (mouse)   | AATCTTGCAGTCGTGTTTGTCA         | AGCTCATCTCCAAATAGTTGATGT       |
| <i>Ccr5</i> (mouse)   | TGTCTTCATGTTAGATTTGTACAGC      | GTGCTGACATAACCATAATCGATG       |
| <i>Ccr8</i> (mouse)   | CTCAGAAGAAAGGTCGCT             | GAGGAACTCTGCGTCACAG            |
| <i>Cd44</i> (mouse)   | GGATGAATCCTCGGAATTACCA         | GCTTTCAACAGTACCTTACCA          |
| <i>Cspg5</i> (mouse)  | CATGATGACTGTGTTCTTTGCC         | GTCGTTGTGGAGCTCAGATG           |
| <i>H3f3a</i> (mouse)  | CGTGAAATCAGACGCTATCAGAA        | TCGCACCAGACGCTGAAAG            |
| <i>Ifng</i> (mouse)   | CTGAGCAATGAACGCTACACA          | TCCACATCTATGCCACTTGAG          |
| <i>Il10</i> (mouse)   | GTCATCGATTTCTCCCCTGTG          | ATGGCCTTGTAGACACCTTG           |
| <i>Igta1</i> (mouse)  | CATCCCTCATAACACCACCTT          | CCAGCGATATAGAGCACATCT          |
| <i>Igta4</i> (mouse)  | GATGGCTTCTCAGATCTCCTTG         | CCCTTTCCATTTCAACCATCAC         |
| <i>Lratp1</i> (mouse) | CATACCATCAACATCTCCCTCA         | CCGTTTCGGTTACAGACAAAG          |
| <i>Lrp6</i> (mouse)   | TGACATCCATGCAGTAAAGGAG         | GAGCATCTTGTCGTACCATCT          |
| <i>Mdk</i> (mouse)    | AGGCTTCTTCTTCTCGCCCTTCTT       | GGCTTTGGTCTTTGACTTGGTCTTG      |
| <i>MDK</i> (human)    | GTCTGAGCTGCGTCCTG              | GCCCTTCTTACCTTATCTTTC          |
| <i>Ptprz1</i> (mouse) | TTCTTAAAGCACATTCGTTCTCAA       | TCCGTTTCCTTGCTGAGTATG          |

## Supplementary References

1. Pan Y, *et al.* Athymic mice reveal a requirement for T-cell-microglia interactions in establishing a microenvironment supportive of *Nf1* low-grade glioma growth. **32**, 491-496 (2018).
2. Heng TS, Painter MW. The Immunological Genome Project: networks of gene expression in immune cells. *Nat Immunol* **9**, 1091-1094 (2008).
